# Supplementary material for: ADRA1A–Gαq signalling potentiates adipocyte thermogenesis through CKB and TNAP
Source: PubMed Central journal article supplement (PMC9684074; doi:10.1038/s42255-022-00667-w), 2022-11-07
Supplement: 42255_2022_667_MOESM1_ESM.pdf [file 42255_2022_667_MOESM1_ESM.pdf]

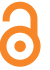

# **ADRA1A–G $\alpha_q$ signalling potentiates adipocyte thermogenesis through CKB and TNAP**

---

In the format provided by the authors and unedited

# Supplementary Table 1

## Genotyping oligonucleotides

### Sequences

#### **Ckb (WT and conditional alleles):**

*Ckb* forward AGG TGG TGG CTA GAG TGA GC  
*Ckb* reverse CAA GGA TCC CAC TGC TCT TC

#### **Adrb1:**

*Adrb1*<sup>+</sup> forward TCG CTA CCA GAG TTT GCT GA  
*Adrb1*<sup>+</sup> reverse GGC ACG TAG AAG GAG ACG AC  
*Adrb1*<sup>-</sup> forward TCG CCT TCT TGA CGA GTT CT  
*Adrb1*<sup>-</sup> reverse TGG CTC TCT ACA CCT TGG AC

#### **Ebf1/Ebf2 (WT and conditional alleles):**

*Ebf1* forward CCC CCA CTT CTT GAG GCC TGT GTT GC  
*Ebf1* reverse CCT GGG AGT GGA GGG AGG AAG GAA AAT  
*Ebf2* forward GAA CTT GGG GCC AGC CTT TT  
*Ebf2* reverse TGT CCT TGA GCT CCC AGG CT

#### **Essra/Essrg (WT and conditional alleles):**

*Essra* forward ATG AGC CAG GAT GCA GGT GCC TGC A  
*Essra* reverse GGC TGA GGC AAA GGG ATG GAG GGG T  
*Essrg* forward GTT TTA AAG GCC CTT GGT GAT CTC GC  
*Essrg* reverse CTG CAA CCC TTG GAC TGC CAG AAC

#### **Ppargc1a (WT and conditional alleles):**

*Ppargc1a* forward TCC AGT AGG CAG AGA TTT ATG AC  
*Ppargc1a* reverse TGT CTG GTT TGA CAA TCT GCT AGG TC

#### **CAG-LSL-Gq-DREAD:**

GqDREADD forward CGC CAC CAT GTA CCC ATA C  
GqDREADD reverse GTG GTA CCG TCT GGA GAG GA

#### **AdipoqCre:**

*AdipoqCre* forward ACG GAC AGA AGC ATT TTC CA  
*AdipoqCre* reverse GGA TGT GCC ATG TGA GTC TG

#### **Ucp1CreERT2:**

*Ucp1CreERT2* forward GAA CCT GAT GGA CAT GTT CAG G  
*Ucp1CreERT2* reverse AGT GCG TTC GAA CGC TAG AGC CTG T

## Supplementary Table 2

### RT-qPCR oligonucleotides (mouse)

#### Sequences

|                         |                                 |
|-------------------------|---------------------------------|
| <i>Ckb</i> forward      | GCC TCA CTC AGA TCG AAA CTC     |
| <i>Ckb</i> reverse      | GGC ATG TGA GGA TGT AGC CC      |
| <i>Alpl</i> forward     | CCA ACT CTT TTG TGC CAG AGA     |
| <i>Alpl</i> reverse     | GGC TAC ATT GGT GTT GAG CTT TT  |
| <i>Ppargc1a</i> forward | AGC CGT GAC CAC TGA CAA CGA G   |
| <i>Ppargc1a</i> reverse | GCT GCA TGG TTC TGA GTG CTA AG  |
| <i>Esrra</i> forward    | CCA GAG GTG GAC CCT TTG CCT TTC |
| <i>Esrra</i> reverse    | CAC CAG CAG ATG CGA CAC CAG AG  |
| <i>Esrrg</i> forward    | CTC CAG CAC CAT CGT AGA GGA TC  |
| <i>Esrrg</i> reverse    | GAT CTC ACA TTC ATT CGT GGC TG  |
| <i>Ucp1</i> forward     | AAG CTG TGC GAT GTC CAT GT      |
| <i>Ucp1</i> reverse     | AAG CCA CAA ACC CTT TGA AAA     |
| <i>Ebf1</i> forward     | CCA ACA GCG AAA AGA CCA ATA A   |
| <i>Ebf1</i> reverse     | TGT TCT GTC CGT ATC CCA TTG     |
| <i>Ebf2</i> forward     | CCA GCT CTG AAA GAC AAG TCG     |
| <i>Ebf2</i> reverse     | GAG GTT GCT TTT CAA AAT GGG C   |
| <i>Ppib</i> forward     | GGA GAT GGC ACA GGA GGA A       |
| <i>Ppib</i> reverse     | GCC CGT AGT GCT TCA GCT T       |
| <i>36b4</i> forward     | TCA TCC AGC AGG TGT TTG ACA     |
| <i>36b4</i> reverse     | GGC ACC GAG GCA ACA GTT         |

### RT-qPCR oligonucleotides (human)

#### Sequences

|                       |                               |
|-----------------------|-------------------------------|
| <i>CKB</i> forward    | ACT TCA GAA GCG AGG CAC AG    |
| <i>CKB</i> reverse    | GAT GAG CAG CTT CAC TCC GT    |
| <i>ADRA1A</i> forward | AAT GCT TCC GAC AGC TCC AA    |
| <i>ADRA1A</i> reverse | TAG TGC GTG ACT GAG TGC AG    |
| <i>ADRB1</i> forward  | GTG GCC CTG CGC GAG CAG AAG   |
| <i>ADRB1</i> reverse  | GCG TAG CCC AGC CAG TTG AAG A |
| <i>ADRB3</i> forward  | CTC CCC TGG TTC CAT TCC TT    |
| <i>ADRB3</i> reverse  | TGG TCT TTT CTA CCC TGC TGC   |
| <i>PPIA</i> forward   | TCC TGG CAT CTT GTC CAT       |
| <i>PPIA</i> reverse   | TGC TGG TCT TGC CAT TCC T     |

# Supplementary Table 3

ChIP-qPCR oligonucleotides (mouse)

Sequences

## ***ERRα -550 (positive control)***

*ERRα -550 forward* GTG GCC CCG CCT TTC CCC GTG ACC TTC ATT  
*ERRα -550 reverse* ACC CCT GAG GAC CCT CAA GTG GAG AAG CAG

## ***ERRα -3722 (negative control)***

*ERRα -3722 forward* TTG GCA TTG ATA TTG GGG GTG GGA GCA ACT  
*ERRα -3722 reverse* GAC TTC TTA CTT TGA CGC TTT CCT CCA TCG

## ***Prox1 -55772 (negative control)***

*Prox1 -55772 forward* CCA AGC ACA AAT ATC TAA TCA CCC TTT C  
*Prox1 -55772 reverse* CTT CTT GAT AGG TTT ATG GGT TGG GC

## ***Ckb DAR 1***

**chr12:111672017-111672490**

*Ckb DAR 1 forward* GAC CTG CAA ACC ACT TGG GAC C  
*Ckb DAR 1 reverse* GAT GCG CTG GAC TCT GAC GAT G

## ***Ckb DAR 2***

**chr12:111670556-111670909**

*Ckb DAR 2 forward* CAG ACG CCA AAG AGA CTG GTC A  
*Ckb DAR 2 reverse* CCT AGT TTG TGC AGT GCC TCC C

## ***Alpl DAR 1***

**chr4:111672017-111672490**

*Alpl DAR 1 forward* CAC TGG CCC CAT ACT TCA GGG T  
*Alpl DAR 1 reverse* AGG CTT CTC AGC TCT TGG GGA G

## ***Alpl DAR 2***

**chr4:111670556-111670909**

*Alpl DAR 2 forward* GGG CAG AAG GCT TGT CCA AGG G  
*Alpl DAR 2 reverse* GAG CTG ACA TGT CCA GAA AAG AGC

## ***Alpl DAR 3***

**chr4:111672017-111672490**

*Alpl DAR 3 forward* TTC TTC TCA CAA GCC CCA GGC  
*Alpl DAR 3 reverse* AGG CTC CCC GGT GAC CTT TTA G

## ***Alpl DAR 4***

**chr4:111670556-111670909**

*Alpl DAR 4 forward* GGC TGC CAG AGC TGG AAA TCA G  
*Alpl DAR 4 reverse* AAC CCA TGA GGC TGT CTG GTG T

## ***Alpl DAR 5***

**chr4:111672017-111672490**

*Alpl DAR 5 forward* GTC ACT GAC CCA GCA ACT ATA GCC  
*Alpl DAR 5 reverse* TCT AGG GTC AAT ATC CTG CCC A

## ***Alpl DAR 6***

**chr4:111670556-111670909**

*Alpl DAR 6 forward* TTG CTG TCC CAT CTG TAC CTG A  
*Alpl DAR 6 reverse* TGG TGA CCT CTT AAC AAC AGA GTG GC

## ***Alpl DAR 7***

**chr4:111672017-111672490**

*Alpl DAR 7 forward* AGG CCA CTC ACC TCT GCA GTC  
*Alpl DAR 7 reverse* GGA GGG TGG AGC TAG GGG TGA T

## ***Alpl DAR 8***

**chr4:111670556-111670909**

*Alpl DAR 8 forward* TCC CCT CCC TTT TGC TTT GTT TC  
*Alpl DAR 8 reverse* GCA TTT CAA GGT GGC AGC CAG A
